# Supplementary material for: DeepSurv: A machine learning model for predicting mortality in very-low-birth-weight infants treated in intensive care units
Source: Research Square preprint supplement (doi:10.21203/rs.3.rs-7126001/v1), 2025-08-11
Supplement: Supplementary file 1 [file 2711cb485af6bd1d2a555c16.pdf]

**Supplementary table S1.** Demographic and clinico-laboratory characteristics of neonates with very low birth weight

| Category of variables                             | Variables                                                                     | Description / Units of measurement |
|---------------------------------------------------|-------------------------------------------------------------------------------|------------------------------------|
| <b>Maternal and perinatal factors</b>             | Mother's age                                                                  | Years                              |
|                                                   | The presence of burdened obstetric history (BOH) in the medical history       | Yes/No                             |
|                                                   | The presence of preeclampsia in the medical history                           | Yes/No                             |
|                                                   | The presence of chorioamnionitis in the medical history                       | Yes/No                             |
|                                                   | The presence of intrauterine growth retardation (IUGR) in the medical history | Yes/No                             |
|                                                   | Childbirth                                                                    | Natural birth/Cesarean section     |
| <b>Neonatal characteristics</b>                   | Sex                                                                           | m/f                                |
|                                                   | Birth weight                                                                  | Grams (g)                          |
|                                                   | Gestational age (GA)                                                          | Weeks                              |
|                                                   | Apgar score at 5 minutes                                                      | Scores (0-10)                      |
|                                                   | Respiratory failure (RF)                                                      | Degree (1-3)                       |
|                                                   | Heart rate (HR)                                                               | Beats per minute (bpm)             |
|                                                   | Oxygen saturation                                                             | Percentages (%)                    |
|                                                   | Blood group (BG)                                                              | (O, A, B, AB)                      |
|                                                   | Rhesus factor (Rh)                                                            | Positive/Negative                  |
| <b>Complications of the early neonatal period</b> | Presence of respiratory distress syndrome (RDS)                               | Yes/No                             |
|                                                   | Presence of intraventricular hemorrhage (IVH)                                 | Yes/No                             |
|                                                   | Presence of disseminated intravascular coagulation syndrome (DIC)             | Yes/No                             |
|                                                   | Presence of necrotizing enterocolitis (NEC)                                   | Yes/No                             |

**Supplementary table S2.** Final hyperparameters for the DeepSurv and RSF models

| Model    | Hyperparameters                                                                                                                                                                                                                         |
|----------|-----------------------------------------------------------------------------------------------------------------------------------------------------------------------------------------------------------------------------------------|
| DeepSurv | Input features: 11; Hidden layers: [511, 141, 127, 16]; Activations: ReLU; BatchNorm: Yes; Dropout: [0.201, 0.496, 0.106, 0.28]; Output: 1; Optimizer: Adam; Learning rate: 0.0045; Weight decay: 0.00097; Batch size: 128; Epochs: 100 |
| RSF      | ntree: 1000; nodesize: 1; mtry: 2; splitrule: bs.gradient; importance: permute; nsplit: 10; samptype: swr                                                                                                                               |

**Supplementary table S3.** General and clinical characteristics of the subjects

| Characteristic                  | Overall<br>N = 958 <sup>1</sup> | Train<br>N = 672 <sup>1</sup> | Test<br>N = 286 <sup>1</sup> | p-value <sup>2</sup> |
|---------------------------------|---------------------------------|-------------------------------|------------------------------|----------------------|
| <b>BOH</b>                      | 594 (62%)                       | 406 (60%)                     | 188 (66%)                    | 0.14                 |
| <b>Preeclampsia</b>             | 298 (31%)                       | 210 (31%)                     | 88 (31%)                     | >0.9                 |
| <b>Chorioamnionitis</b>         | 55 (5.7%)                       | 36 (5.4%)                     | 19 (6.6%)                    | 0.5                  |
| <b>IUGR</b>                     | 237 (25%)                       | 184 (27%)                     | 53 (19%)                     | 0.005                |
| <b>Childbirth</b>               | 665 (69%)                       | 462 (69%)                     | 203 (71%)                    | 0.5                  |
| <b>Sex</b>                      | 477 (50%)                       | 331 (49%)                     | 146 (51%)                    | 0.7                  |
| <b>Birth weight, m±SD</b>       | 1,107 ± 305                     | 1,101 ± 307                   | 1,121 ± 298                  | 0.3                  |
| <b>Apgar score at 5 minutes</b> |                                 |                               |                              | 0.046                |
| 2                               | 20 (2.1%)                       | 10 (1.5%)                     | 10 (3.5%)                    |                      |
| 3                               | 89 (9.3%)                       | 64 (9.5%)                     | 25 (8.7%)                    |                      |
| 4                               | 142 (15%)                       | 111 (17%)                     | 31 (11%)                     |                      |
| 5                               | 136 (14%)                       | 87 (13%)                      | 49 (17%)                     |                      |
| 6                               | 255 (27%)                       | 184 (27%)                     | 71 (25%)                     |                      |
| 7                               | 282 (29%)                       | 189 (28%)                     | 93 (33%)                     |                      |
| 8                               | 31 (3.2%)                       | 25 (3.7%)                     | 6 (2.1%)                     |                      |
| 9                               | 3 (0.3%)                        | 2 (0.3%)                      | 1 (0.3%)                     |                      |
| <b>GA, m±SD</b>                 | 29 ± 3                          | 29 ± 3                        | 29 ± 3                       | 0.4                  |
| <b>RF</b>                       |                                 |                               |                              | 0.2                  |
| 1                               | 15 (1.6%)                       | 13 (1.9%)                     | 2 (0.7%)                     |                      |
| 2                               | 512 (53%)                       | 351 (52%)                     | 161 (56%)                    |                      |
| 3                               | 431 (45%)                       | 308 (46%)                     | 123 (43%)                    |                      |
| <b>HR</b>                       | 114 ± 27                        | 114 ± 28                      | 114 ± 27                     | 0.9                  |
| <b>Oxygen saturation</b>        | 75 ± 14                         | 75 ± 14                       | 75 ± 14                      | 0.9                  |
| <b>BG</b>                       |                                 |                               |                              | 0.9                  |
| O (I)                           | 323 (34%)                       | 232 (35%)                     | 91 (32%)                     |                      |
| A (II)                          | 282 (29%)                       | 195 (29%)                     | 87 (30%)                     |                      |
| B (III)                         | 274 (29%)                       | 191 (28%)                     | 83 (29%)                     |                      |
| AB (IV)                         | 79 (8.2%)                       | 54 (8.0%)                     | 25 (8.7%)                    |                      |
| <b>Rh</b>                       | 915 (96%)                       | 636 (95%)                     | 279 (98%)                    | 0.069                |
| <b>RDS</b>                      | 777 (81%)                       | 535 (80%)                     | 242 (85%)                    | 0.085                |
| <b>IVH</b>                      | 490 (51%)                       | 341 (51%)                     | 149 (52%)                    | 0.8                  |
| <b>DIC</b>                      | 382 (40%)                       | 261 (39%)                     | 121 (42%)                    | 0.4                  |
| <b>NEC</b>                      | 139 (15%)                       | 97 (14%)                      | 42 (15%)                     | >0.9                 |

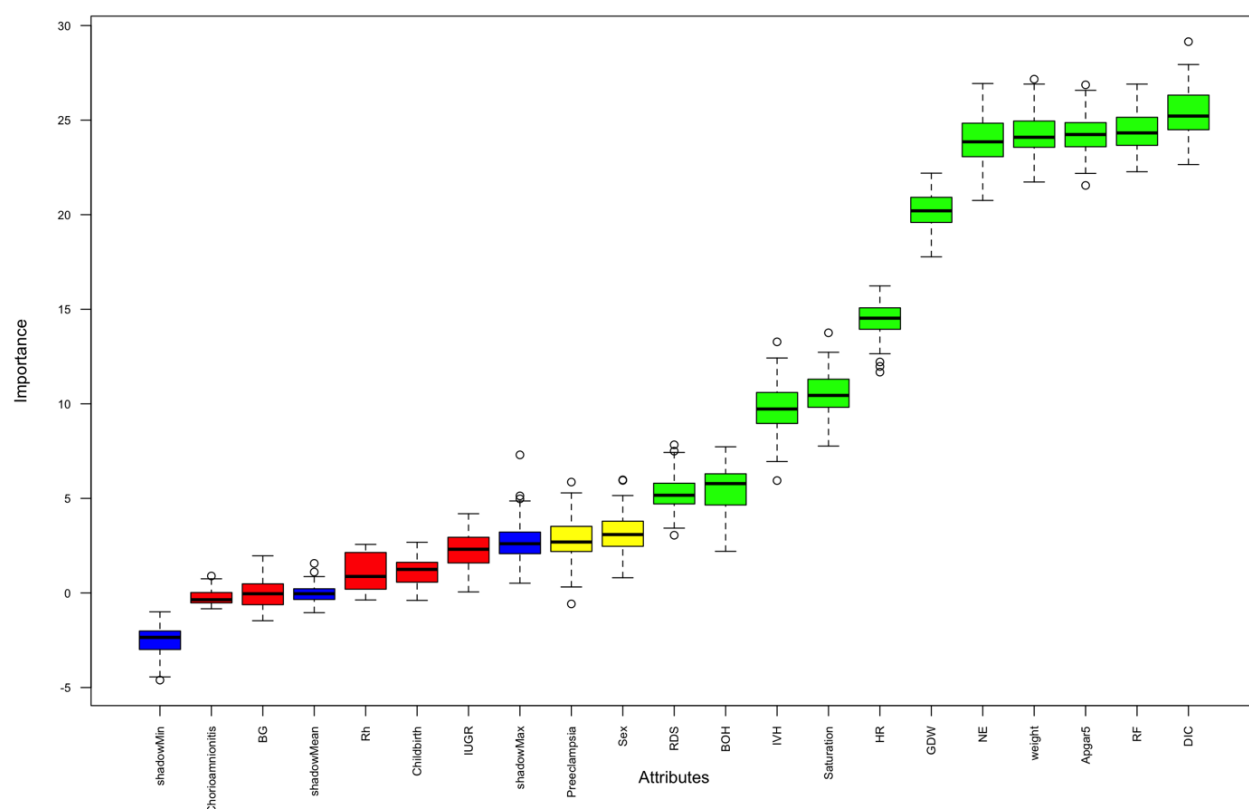

**Figure S1.** Significant variables determined by the Boruta algorithm
